# Supplementary material for: Nanostructured CuP2/C composites as high-performance anode materials for sodium ion batteries
Source: Royal Society of Chemistry journal article supplement (doi:10.1039/c5ta05781g), 2015-01-01
Supplement: c5ta05781g1.pdf [file c5ta05781g1.pdf]

## Supporting Information for

### Nanostructured $\text{CuP}_2/\text{C}$ Composites as High-Performance Anode Materials for Sodium Ion Batteries

Feipeng Zhao, Na Han, Wenjing Huang, Jiaojiao Li, Hualin Ye, Fengjiao Chen, Yanguang

Li\*

Institute of Functional Nano & Soft Materials (FUNSOM), Soochow University, Suzhou 215123,  
China

E-mail: [yanguang@suda.edu.cn](mailto:yanguang@suda.edu.cn)

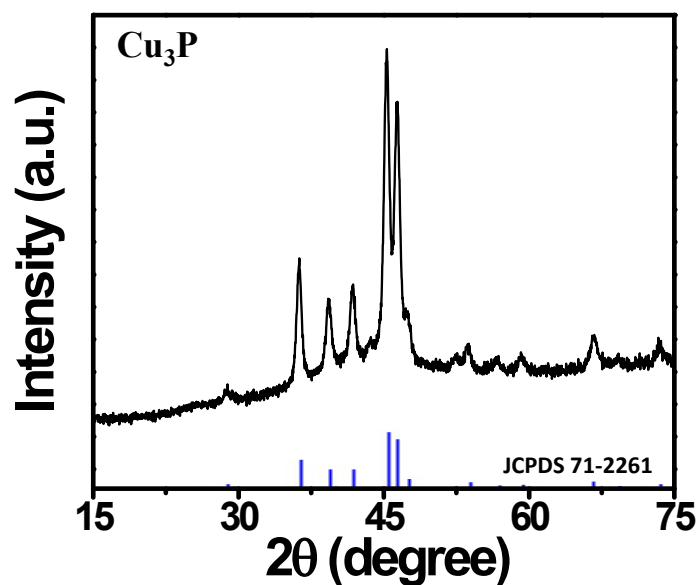

**Figure S1.** XRD pattern of  $\text{Cu}_3\text{P}$  prepared with a starting Cu to P ratio of 3 using HEBM.

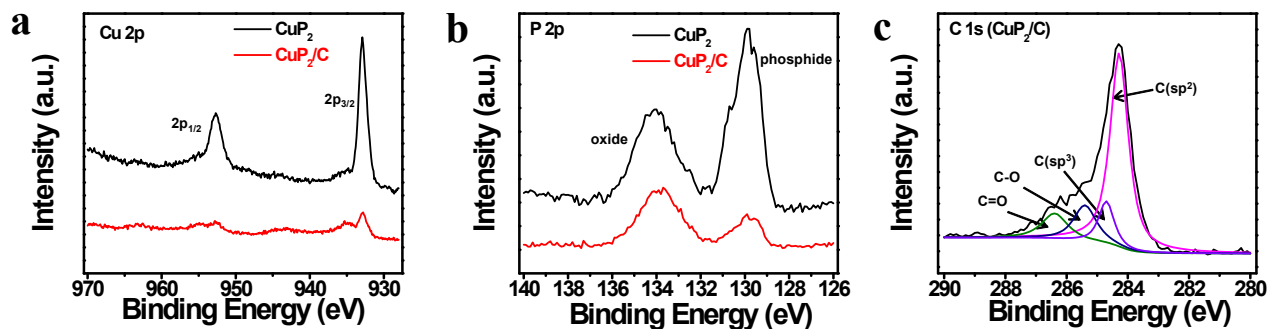

**Figure S2.** (a) Cu 2p, (b) P 2p and (c) C 1s XPS spectra of pure  $\text{CuP}_2$  and  $\text{CuP}_2/\text{C}$  composites.

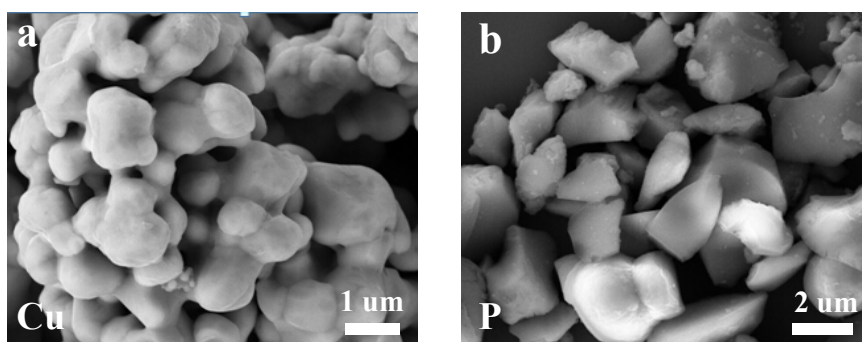

**Figure S3.** SEM images of (a) Cu and (b) P precursor powders for HEBM.

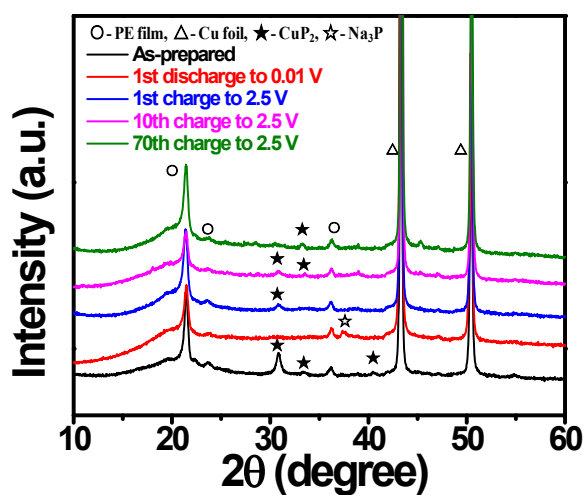

**Figure S4.** XRD patterns of electrode materials in different charge and discharge states in comparison with the initial state.

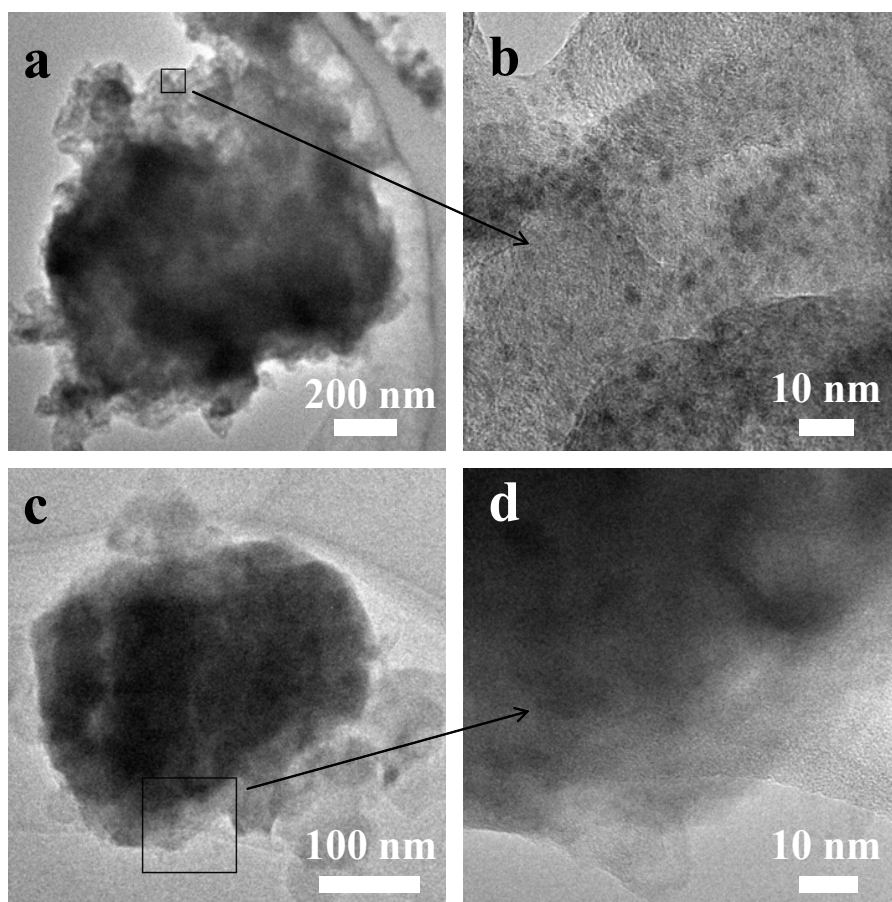

**Figure S5.** TEM images of electrode materials at (a,b) the fully discharged state and (c,d) the fully charged state.

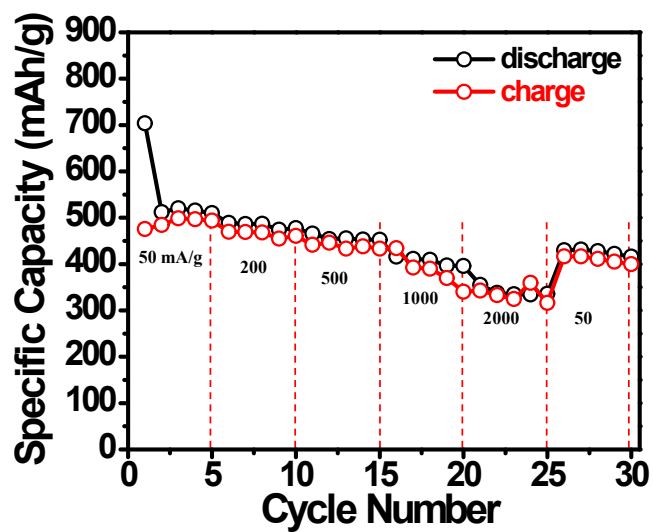

**Figure S6.** Rate capability of  $\text{CuP}_2/\text{C}$  electrode materials under fixed discharge current density (50 mA/g) and varying charge current densities as indicated.

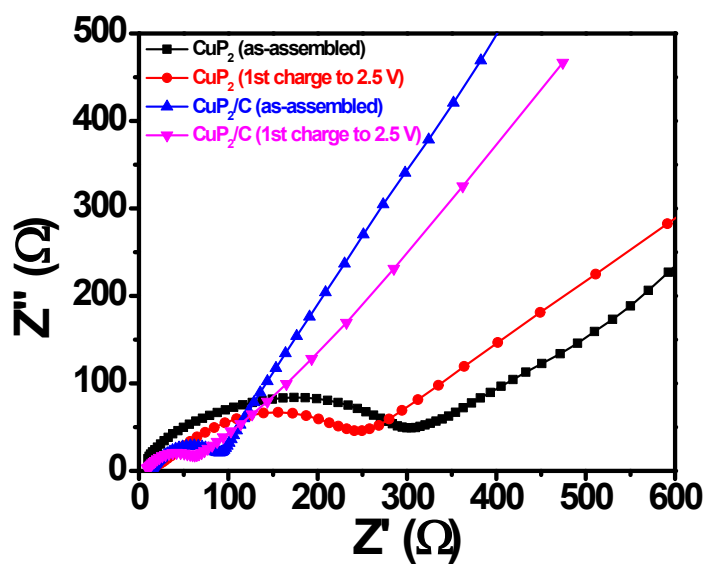

**Figure S7.** Electrochemical impedance spectroscopy (EIS) analysis of  $\text{CuP}_2$  and  $\text{CuP}_2/\text{C}$  at both the as-assembled state and the 1st recharge back to 2.5 V.

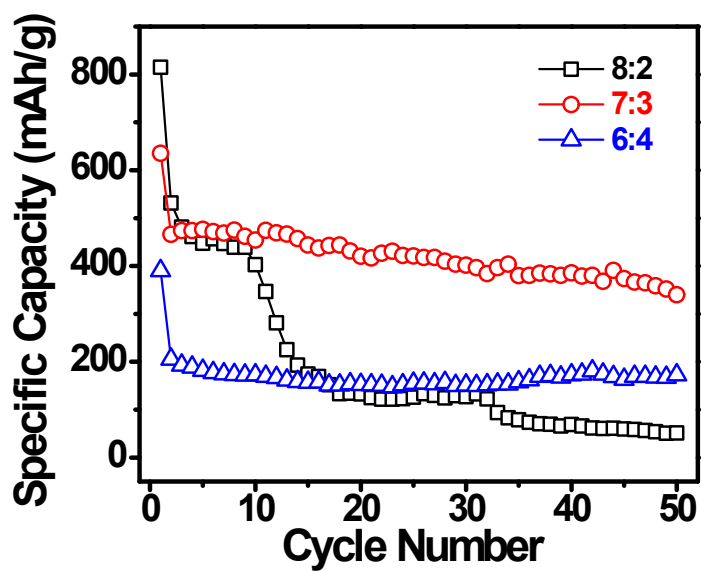

**Figure S8.** Cycling performances of  $\text{CuP}_2/\text{C}$  composites with different  $\text{CuP}_2$  to carbon black ratios.

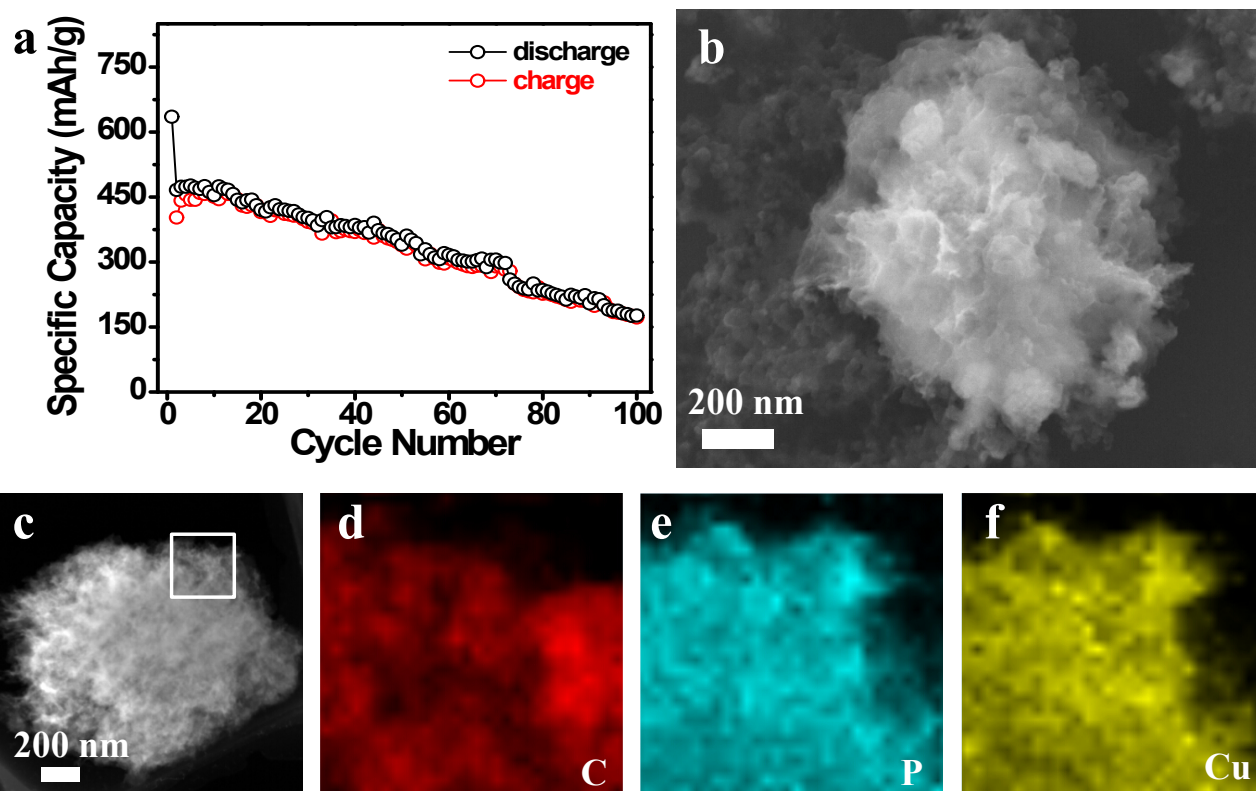

**Figure S9.** (a) Long-term cycling performance of  $\text{CuP}_2/\text{C}$  composites; (b) SEM image, (c) STEM image and (d-f) corresponding EDS elemental mapping of the electrode material after 70 charge/discharge cycles.
